# Supplementary material for: More Is Not Always Better—the Double-Headed Role of Fibronectin in Staphylococcus aureus Host Cell Invasion
Source: PubMed Central journal article supplement (PMC8524341; doi:10.1128/mbio.01062-21), 2021-10-19
Supplement: mbio.01062-21-sf003.pdf [file mbio.01062-21-sf003.pdf]

**Fig. S3**

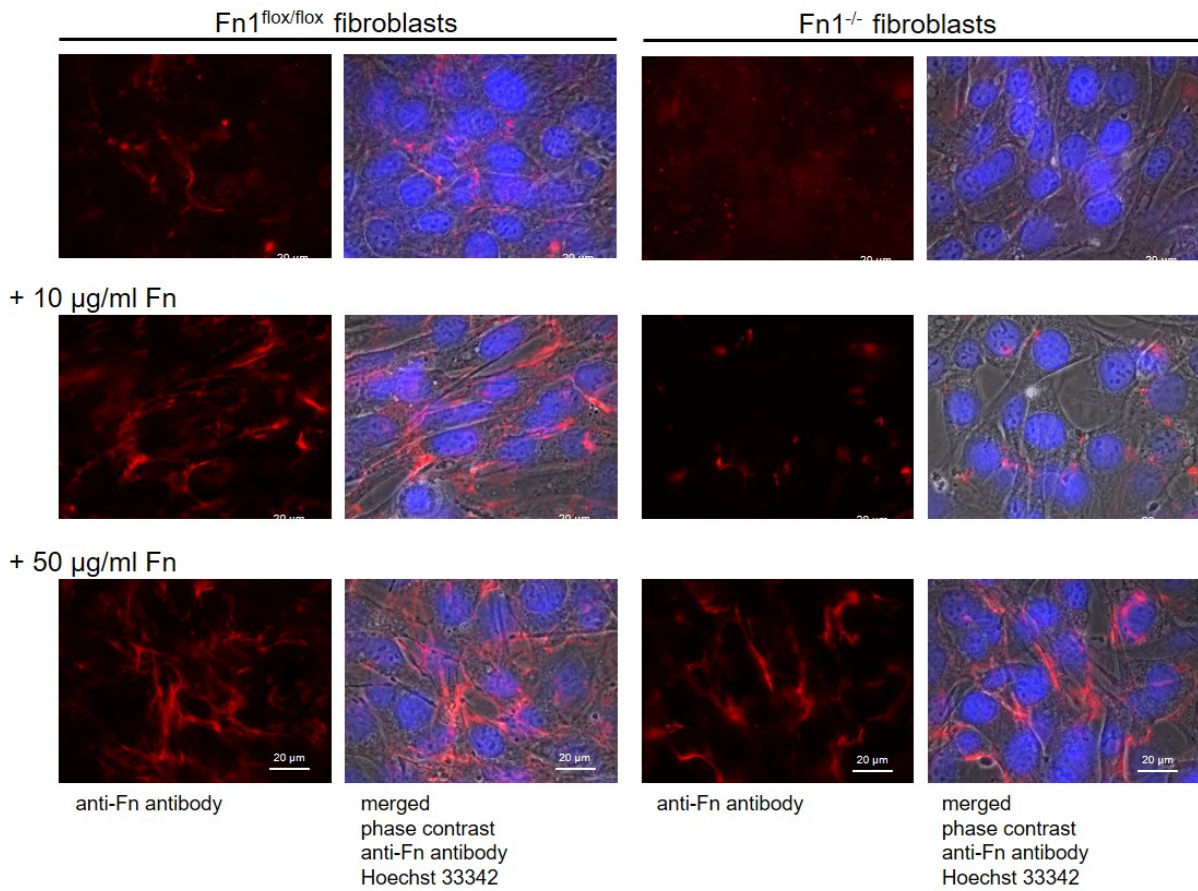

**Fig. S3: Fn fibril formation by mouse fibroblasts and Fn-null mouse fibroblasts is dependent on the amount of Fn in growth medium.** Representative images of immunofluorescence microscopy. Fn1<sup>flox/flox</sup> control fibroblasts and Fn1<sup>-/-</sup> fibroblasts were grown in basal medium supplemented with 10% Fn-depleted FBS. Growth medium was supplemented with 0, 10 or 50 μg/ml exogenous Fn during cultivation for three days. Cells were stained for Fn (red) and nucleic acid with Hoechst 33342 (blue).
