# Supplementary material for: More Is Not Always Better—the Double-Headed Role of Fibronectin in Staphylococcus aureus Host Cell Invasion
Source: PubMed Central journal article supplement (PMC8524341; doi:10.1128/mbio.01062-21), 2021-10-19
Supplement: mbio.01062-21-sf007.pdf [file mbio.01062-21-sf007.pdf]

**Fig. S7**

**A**

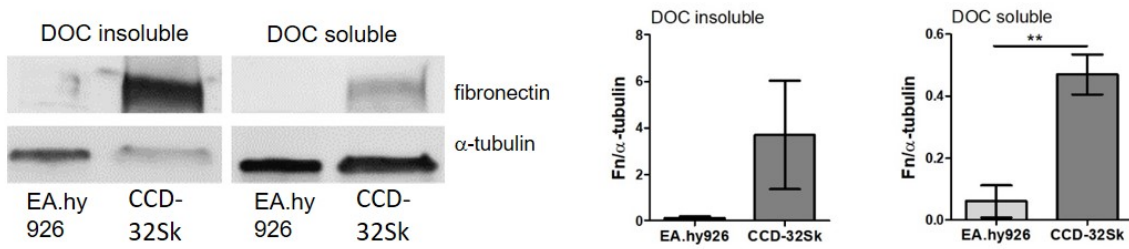

**B**

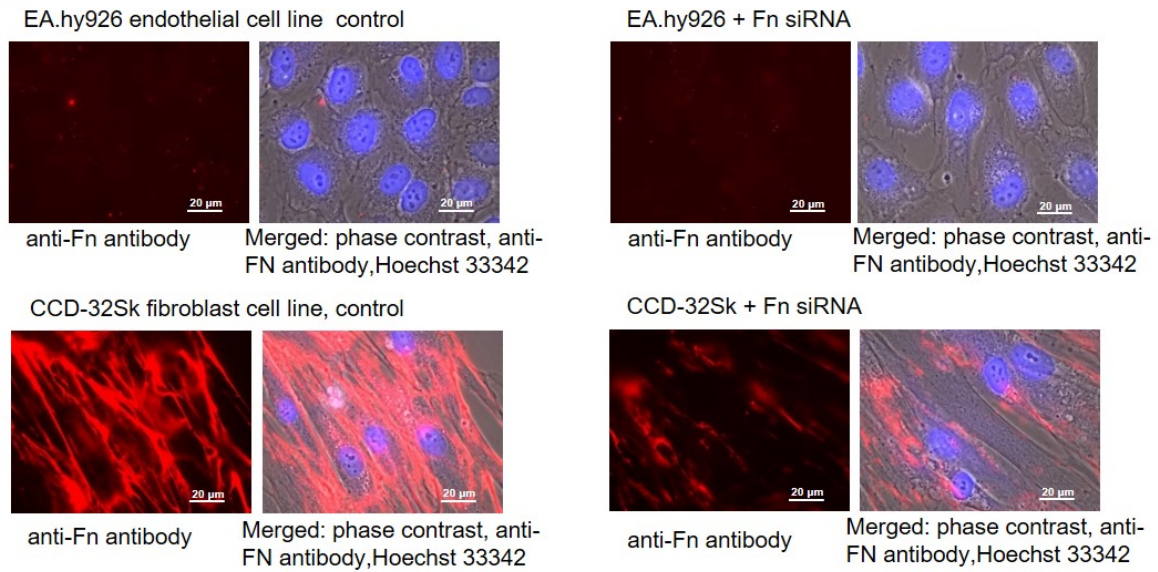

**C**

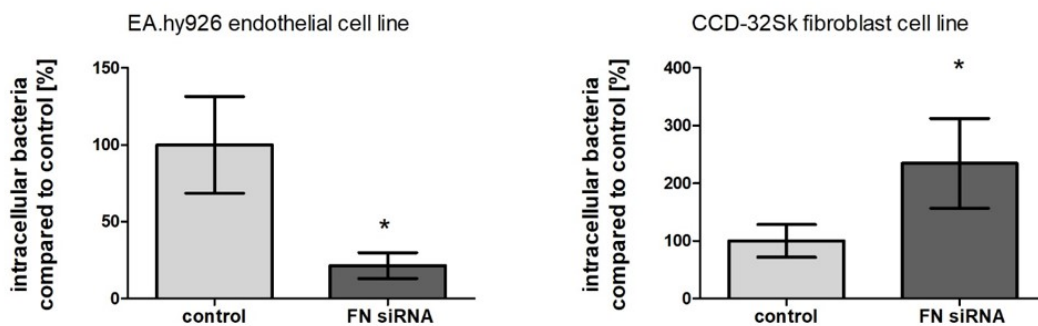

**Fig. S7: Augmenting effect on bacterial uptake efficacy by Fn silencing in fibroblast cell line.**

**(A)** After three days of growth, the DOC insoluble and the DOC soluble protein fraction of EA.hy926 endothelial cell line and CCD-32Sk fibroblast cell line were harvested and analyzed by Western blotting (see also Fig. S2). Data are means  $\pm$  SD of Western blot quantification of three independent experiments. \*\*  $p < 0.01$ , unpaired t-test. **(B)** Representative images of Fn expression on EA.hy926 endothelial cells and CCD-32Sk fibroblasts without and with Fn silencing by Fn siRNA detected by immunofluorescence microscopy using an antibody against Fn (red) and Hoechst 33342 for nucleic acid staining (blue). **(C)** Lysostaphin protection assay was performed to quantify intracellular bacteria one hour post infection of either EA.hy926 or CCD-32Sk cells with *S. carnosus* TM300(pFNBA4) without and with Fn silencing by Fn siRNA. Data are means  $\pm$  SD of three independent experiments. \*  $p < 0.05$ , unpaired t-test.
