# Supplementary material for: More Is Not Always Better—the Double-Headed Role of Fibronectin in Staphylococcus aureus Host Cell Invasion
Source: PubMed Central journal article supplement (PMC8524341; doi:10.1128/mbio.01062-21), 2021-10-19
Supplement: mbio.01062-21-sf008.pdf [file mbio.01062-21-sf008.pdf]

**Fig. S8**

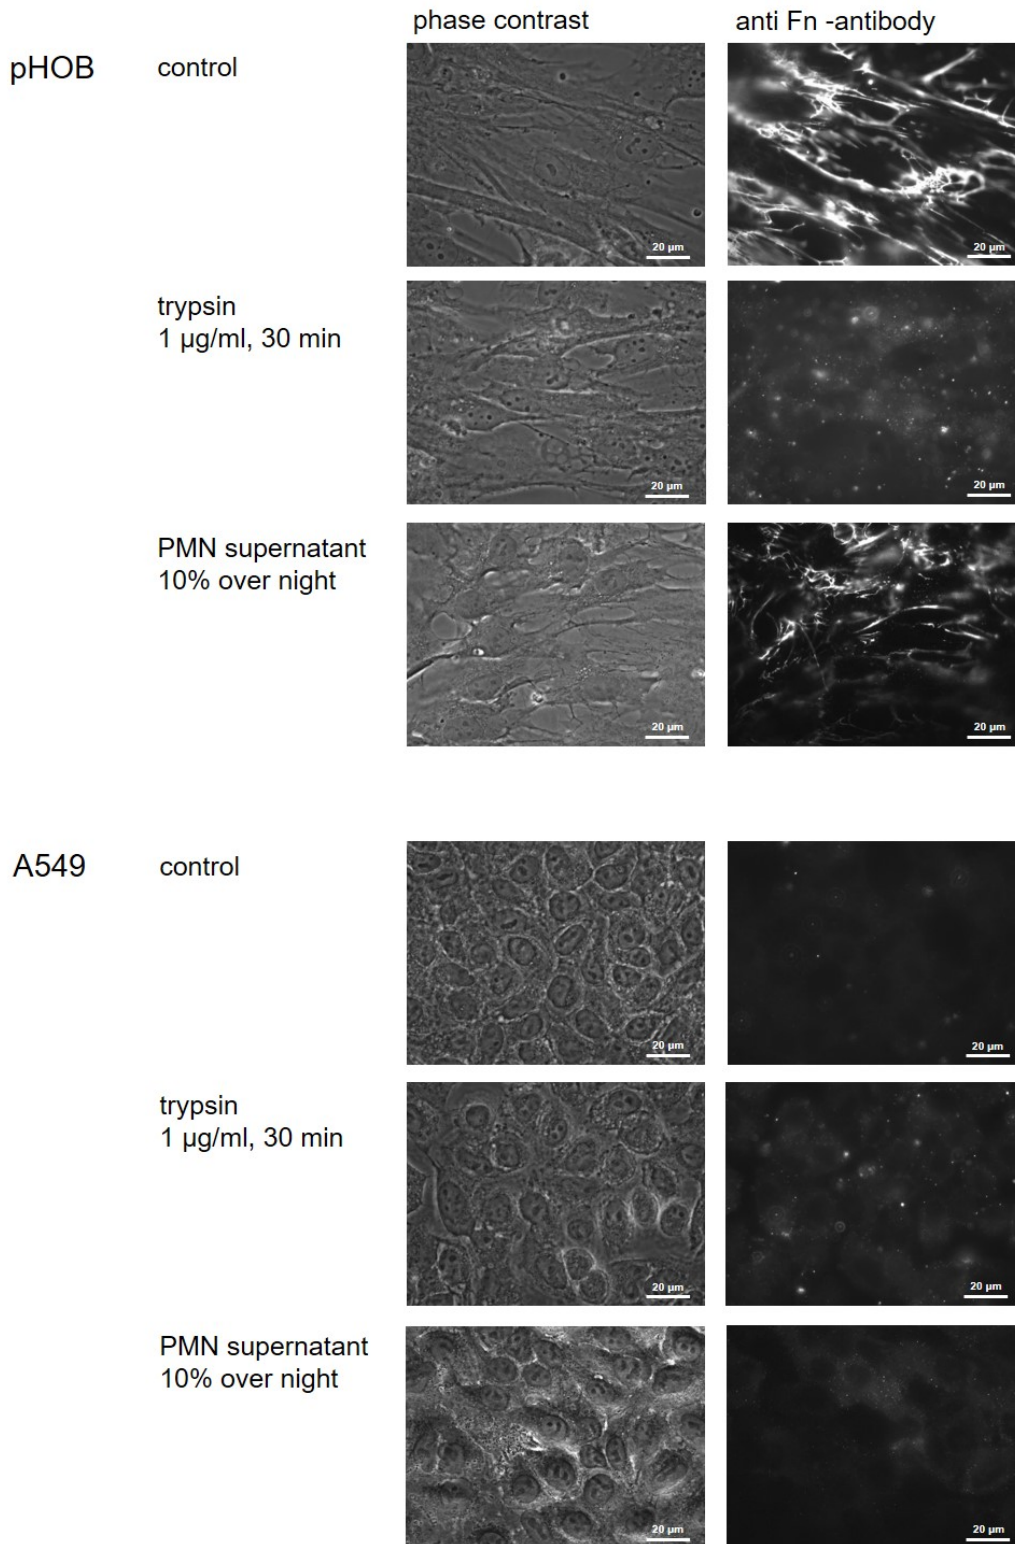

**Fig. S8: Fn fibrils are destroyed by trypsin and supernatant of lysed neutrophils.** Representative images of phase contrast and immunofluorescence microscopy. pHOB and A549 were grown for two days in normal growth medium supplemented with FBS and then treated either with 1 μg/ml trypsin for 30 min in invasion medium or over night with 10 % supernatant of lysates of polymorphonuclear neutrophils (PMN, destroyed by ultrasound) in basal medium supplemented with 0.21% BSA. Cells were fixed and stained for Fn.
